# Supplementary material for: Drosophila melanogaster dHCF Interacts with both PcG and TrxG Epigenetic Regulators
Source: PubMed Central journal article supplement (PMC3234250; doi:10.1371/journal.pone.0027479), 2011-12-08

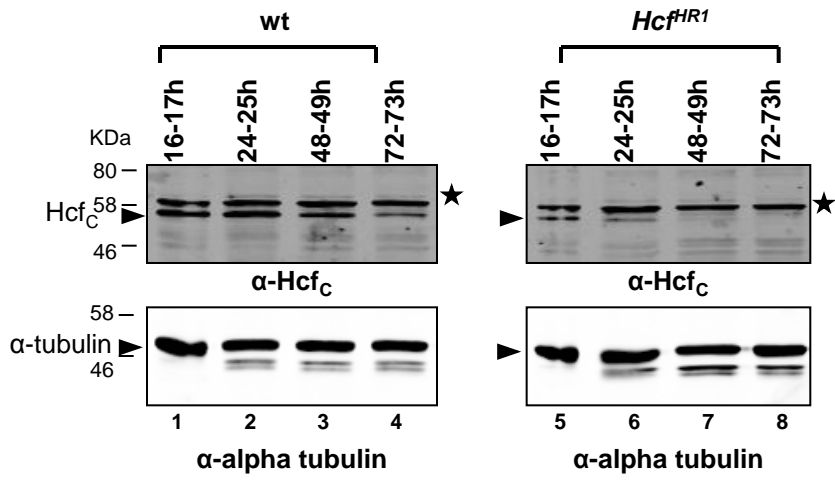

Supplement: pone.0027479.s001.pdf [file pone.0027479.s001.pdf]
