# Supplementary material for: Drosophila melanogaster dHCF Interacts with both PcG and TrxG Epigenetic Regulators
Source: PubMed Central journal article supplement (PMC3234250; doi:10.1371/journal.pone.0027479), 2011-12-08
Supplement: pone.0027479.s002.pdf [file pone.0027479.s002.pdf]

*ci-GAL4 / UAS-Hcf-RNAi; UAS-Hcf-RNAi / UAS-GFP*

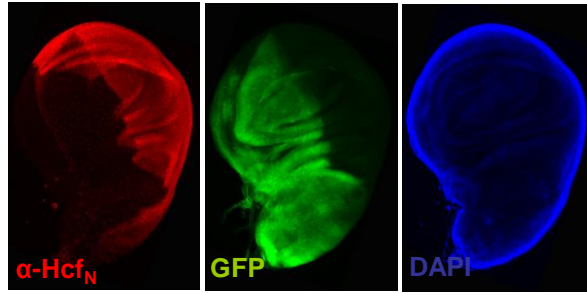

Figure S2
